# Supplementary material for: Transcriptome Analysis Reveals the Gene Expression Changes in the Silkworm (Bombyx mori) in Response to Hydrogen Sulfide Exposure
Source: MDPI journal article supplement (doi:10.3390/insects12121110), 2021-12-13
Supplement: s1 [file s1]

**Table S1.** Primer's sequence of genes used in qRT-PCR analysis.

| Gene ID      | Gene Name                                                     | Primers                                             |
|--------------|---------------------------------------------------------------|-----------------------------------------------------|
| 100145915    | Actin A3                                                      | F: aagattccgtgtcccagagg<br>R: atgtccacgtcgcacttcat  |
| TpnI         | Troponin I transcript variant C                               | F: ggagccaggggaaacgtaaa<br>R: ttgggagttcaggctcggaga |
| LOC105842021 | Ras GTPase- activating protein nGAP-like                      | F: ctaaggatccggcagcagg<br>R: acttcccgttcggttctgac   |
| 100529234    | Transform growth factor beta-activated kinase 1 (Tab1)        | F: ctgatacctagtaagcgcggg<br>R: acggccttgagctctgtctg |
| Ldh          | Lactate dehydrogenase                                         | F: cgttcacgcggtctctactt<br>R: gatttccgaagctgtgccac  |
| LOC101738228 | Multiple inositol polyphosphate phosphatase 1-like (Mpp-1)    | F: cgtgaccgtgtttctaagcg<br>R: atccctctggctgcattat   |
| LOC101739645 | Phosphoglycerate kinase (PGK)                                 | F: tgcctggcgtgtttgagtttg<br>R: agtagagacgtgcgagacct |
| LOC101740694 | Retinal dehydrogenase 1-like (RD-1)                           | F: ctactggcaggtggagaacg<br>R: gctctggactggaccgaaaa  |
| LOC101743212 | Phosphoglucomutase (PGM)                                      | F: ttccgatgctaccaccgatg<br>R: ttgactgtaaactgccgct   |
| LOC692988    | Aldehyde dehydrogenase isoform 2 (Ald-2)                      | F: tcgtaataaggcgctggaac<br>R: aactcagtgtctcttgcgg   |
| LOC101736196 | Glucose-6-phosphate 1-epimerase (G6P1)                        | F: gcggaagatgcggatacaga<br>R: atgttggggaactgcgtctc  |
| Khc          | Kinesin heavy chain                                           | F: gcgttctggtagactgtca<br>R: caggaggtgtctggaggtttt  |
| LOC100862772 | Heat shock protein 68 (Hsp68)                                 | F: cattgaaactgccgtgggtg<br>R: tgctgggtggctgtcagaat  |
| LOC101735878 | Ubiquitin carboxyl-terminal hydrolase 5 (UCJHL-5)             | F: tcgccataggagttgagga<br>R: accattgtccagctgcttga   |
| Rab10        | Small GTP-binding protein Rab10 (Rab 10)                      | F: acgagcatgcaaacagagat<br>R: tccgctagtccgagaaagc   |
| ST5          | Putative sugar transporter protein 5                          | F: ggtgtacacgtgcgaggtat<br>R: cagcatgctcaggagtga    |
| Vps4         | Vacuolar protein sorting 4                                    | F: agcggctaaaaagtggagga<br>R: tgacattgtaactggcggt   |
| LOC101735597 | Protein yippee-like CG15309 isoform X1 (Pyl-CG15309)          | F: agacaatgctcggctggaaa<br>R: ccaaccgttctccttca     |
| LOC101740132 | Leucine-rich repeat serine/threonine-protein kinase 1 (LRRK1) | F: gagtctaagctcgtcccg<br>R: ttctccacgtctagcagga     |
| LOC101745176 | Titin                                                         | F: cagtggaaagtttggtgg<br>R: aattcggcgtctctgttctg    |
| LOC101744194 | Facilitated trehalose transporter Tret1 (Tret1)               | F: gtatccactcggcagctacc<br>R: aatagacctgtgacggagcg  |
| Kettin       | Kettin protein                                                | F: gacgagatagagccggttg<br>R: agtagccctgggagttacgt   |
| LOC101736589 | Matrix metalloproteinase-3-like (MMP-3)                       | F: ccggagttggctacacttac<br>R: ccttctatgcgactcttct   |
| LOC100101164 | NADPH-specific isocitrate dehydrogenase (IDH)                 | F: atgtggctaagtcggaacgg<br>R: cgctctctgtctgacctac   |
| LOC101736848 | 2-Oxoglutarate dehydrogenase, mitochondrial (2-OGD)           | F: ggagacaacgagggaagaa<br>R: tcacgtggaatatcggagcg   |
| LOC101737640 | Pyruvate carboxylase (PC)                                     | F: gggaggagctacattcgacg<br>R: atgccagtagcaagttcgg   |
| Fib-H        | Fibroin heavy chain                                           | F: gttacggagctggcaggg<br>R: agcaattcacacaaggcagt    |

|       |                     |                                                    |
|-------|---------------------|----------------------------------------------------|
| P25   | Fibroin P25         | F: cgaaatgtatcccgggcaga<br>R: tcaaagttcagccacggaca |
| Fib-L | Fibroin light chain | F: gccggcttcagacaatctct<br>R: tgagcggttatgtaggcagc |

---
