# Supplementary material for: Transcriptome Analysis Reveals the Gene Expression Changes in the Silkworm (Bombyx mori) in Response to Hydrogen Sulfide Exposure
Source: MDPI journal article supplement (doi:10.3390/insects12121110), 2021-12-13
Supplement: s1 [file s1]

**Table S3.** Distribution of gene expression levels between H<sub>2</sub>S-treated and the control group.

| FPKM                  |              |              |              |              |            |            |
|-----------------------|--------------|--------------|--------------|--------------|------------|------------|
| Interval (FI)         | 0-0.1 FI     | 0.1-0.3 FI   | 0.3-3.57 FI  | 3.57-15 FI   | 15-60 FI   | >60 FI     |
| FB_Control_1          | 2843(29.20%) | 2039(20.94%) | 3224(33.11%) | 842(8.65%)   | 365(3.75%) | 423(4.34%) |
| FB_Control_2          | 2685(27.51%) | 1926(19.73%) | 3522(36.09%) | 816(8.36%)   | 406(4.16%) | 405(4.15%) |
| FB_Control_3          | 2860(27.91%) | 1982(19.34%) | 3576(34.89%) | 967(9.44%)   | 431(4.21%) | 433(4.22%) |
| FB_H <sub>2</sub> S_1 | 1953(16.47%) | 1704(14.37%) | 4591(38.72%) | 2152(18.15%) | 816(6.88%) | 642(5.41%) |
| FB_H <sub>2</sub> S_2 | 2264(20.27%) | 1844(16.51%) | 4283(38.35%) | 1567(14.03%) | 641(5.74%) | 569(5.09%) |
| FB_H <sub>2</sub> S_3 | 2004(17.75%) | 1806(16.00%) | 4573(40.51%) | 1693(15.00%) | 674(5.97%) | 539(4.77%) |

## RNA-seq of the partial DEGs

| Gene     | log <sub>2</sub> (FC) | P-Value | Regulation | Gene        | log <sub>2</sub> (FC) | P-Value | Regulation |
|----------|-----------------------|---------|------------|-------------|-----------------------|---------|------------|
| MMP-3    | -6.70                 | 0.00    | down       | VPS4        | 3.33                  | 0.01    | up         |
| Ras GAPs | -7.27                 | 0.00    | down       | Pyl-CG15309 | -1.15                 | 0.00    | down       |
| Ldh      | 3.19                  | 0.02    | up         | Titin       | 2.83                  | 0.05    | up         |
| MPP-1    | 3.25                  | 0.02    | up         | LRRK1       | 3.31                  | 0.01    | up         |
| Tab1     | -6.87                 | 0.00    | down       | Tret1       | 4.02                  | 0.00    | up         |
| G6P1     | 3.77                  | 0.02    | up         | Kettin      | 4.24                  | 0.00    | up         |
| PGK      | 2.77                  | 0.04    | up         | 2-OGD       | 3.42                  | 0.01    | up         |
| PGM      | 2.89                  | 0.02    | up         | Fib-H       | 3.56                  | 0.02    | up         |
| Ald-2    | 3.26                  | 0.00    | up         | P25         | 4.02                  | 0.00    | up         |
| Khc      | 4.25                  | 0.00    | up         | PC          | 2.97                  | 0.02    | up         |
| Hsp68    | 4.20                  | 0.00    | up         | TpnI        | 3.42                  | 0.02    | up         |
| UCHL-5   | 3.45                  | 0.00    | up         | IDH         | 2.93                  | 0.03    | up         |
| Rab10    | 4.08                  | 0.01    | up         | Fib-L       | 3.93                  | 0.03    | up         |
| ST5      | 3.78                  | 0.02    | up         | RD-1        | 2.77                  | 0.04    | up         |
